# Supplementary material for: The role of reaction conditions in the polymorphic control of Eu3+ doped YInO3: structure and size sensitive luminescence
Source: Royal Society of Chemistry journal article supplement (doi:10.1039/c4dt02717e), 2014-12-05
Supplement: c4dt02717e1.pdf [file c4dt02717e1.pdf]

## Supplementary Information

### (Supplementary Information-I)

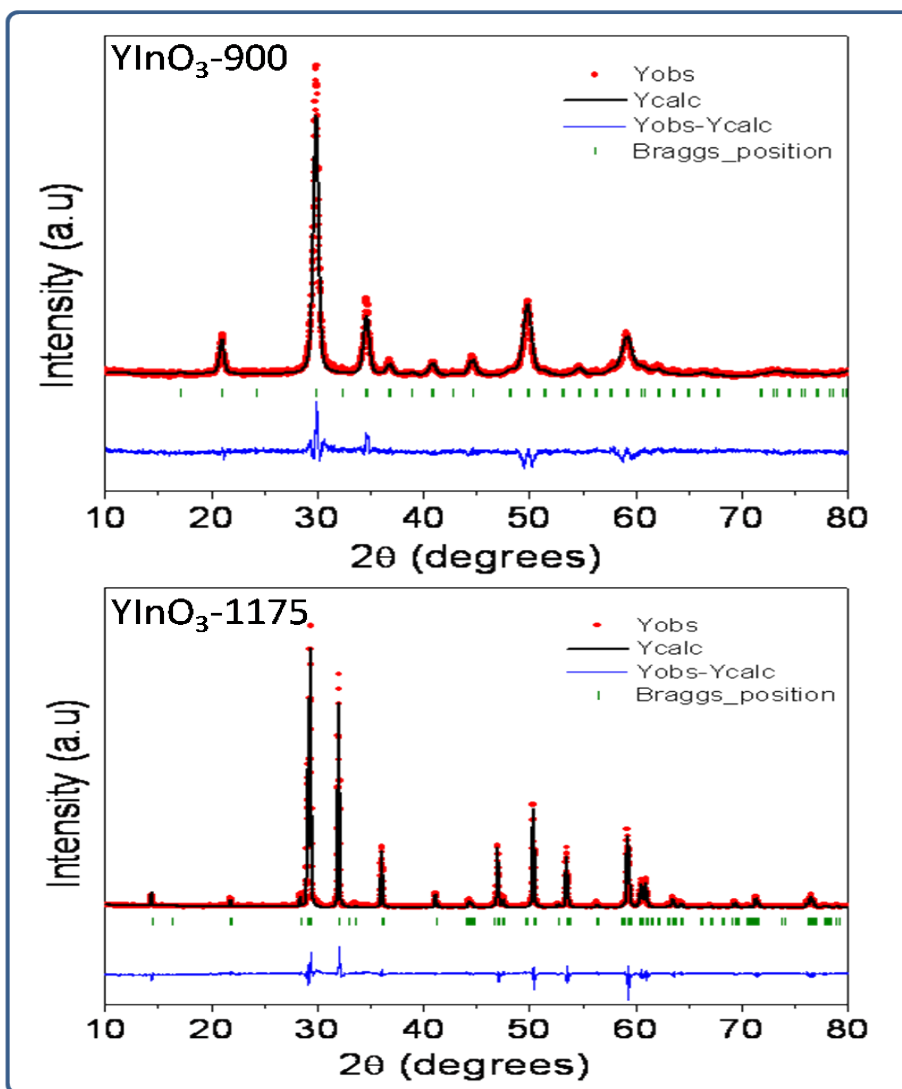

**Fig S-1.** The Rietveld refined XRD patterns for YInO<sub>3</sub>- 900 (C-type) and YInO<sub>3</sub>-1175(hexagonal)

(Supplementary Information-II)

Table S-1: Rietveld refined parameters for YInO<sub>3</sub> heat-treated at 900°C and 1175°C

| Molecular formula            | YInO <sub>3</sub> -900                                               | YInO <sub>3</sub> -1175    |
|------------------------------|----------------------------------------------------------------------|----------------------------|
| Tolerance Factor             | 0.8295                                                               |                            |
| Space Group                  | <i>Ia-3</i>                                                          | <i>P 6<sub>3</sub> c m</i> |
| Unit cell parameter          |                                                                      |                            |
| <i>a</i> (Å)                 | 10.3585 (5)                                                          | 6.2727 (1)                 |
| <i>b</i> (Å)                 | 10.3585 (5)                                                          | 6.2727 (1)                 |
| <i>c</i> (Å)                 | 10.3585 (5)                                                          | 12.2563 (0)                |
| Vol (Å <sup>3</sup> )        | 1111.45(9)                                                           | 417.63 (9)                 |
| No of Parameters             | 8                                                                    | 10                         |
| Refinement                   | Rietveld refinements<br>(Fullprof-2K) (Rodriguez-<br>Caravjal, 2000) |                            |
| Profile                      | Pseudo-voigt                                                         |                            |
| Goodness-of-fit ( $\chi^2$ ) | 2.30                                                                 | 1.73                       |
| R <sub>p</sub>               | 20.5                                                                 | 10.6                       |
| R <sub>wp</sub>              | 23.5                                                                 | 15.3                       |
| R <sub>F</sub>               | 15.5                                                                 | 5.56                       |
